# Supplementary material
Source: PubMed Central journal article supplement (PMC10502696)
Supplement: jamaoncol-e233748-s003.pdf [file jamaoncol-e233748-s003.pdf]

## Data Sharing Statement

Swisher. Remotely Delivered Cancer Genetic Testing in the Making Genetic Testing Accessible (MAGENTA) Trial. *JAMA Oncol.* Published September 14, 2023.  
doi:10.1001/jamaoncol.2023.3748

### Data

**Data available:** No

### Additional Information

**Explanation for why data not available:** Data from this study will not be shared on an individual participant basis as subjects were not consented with knowledge of data sharing. However, the authors will share summary de-identified data upon request.
